# Supplementary material for: Modulating crystal and electronic structure of NiFe-MOFs by inorganic acid for highly efficient electrochemical water oxidation
Source: Royal Society of Chemistry journal article supplement (doi:10.1039/d2dt02925a), 2023-01-01
Supplement: d2dt02925a1.pdf [file d2dt02925a1.pdf]

## Supporting Information for

### **Modulating crystal and electronic structure of NiFe-MOFs by inorganic acid for highly efficient electrochemical water oxidation**

Fang Wu,<sup>a,b</sup> Qiulin Li,<sup>c</sup> Hu Guo,<sup>a</sup> Suwei Wang,<sup>a</sup> Gazi Hao,<sup>a</sup> Yubing Hu,<sup>a</sup> Guangpu Zhang,<sup>a</sup> Wei Jiang<sup>\*a</sup>

E-mail: [superfine\\_jw@126.com](mailto:superfine_jw@126.com)

<sup>a</sup>School of Chemical Engineering, Nanjing University of Science and Technology, Nanjing 210094, China. E-mail: [superfine\\_jw@126.com](mailto:superfine_jw@126.com).

<sup>b</sup>School of Material and Chemical Engineering, Bengbu University, Bengbu, Anhui 233000, China.

<sup>c</sup>Jiangsu Key Laboratory for Environment Functional Materials, Suzhou University of Science and Technology, Suzhou 215009, China.

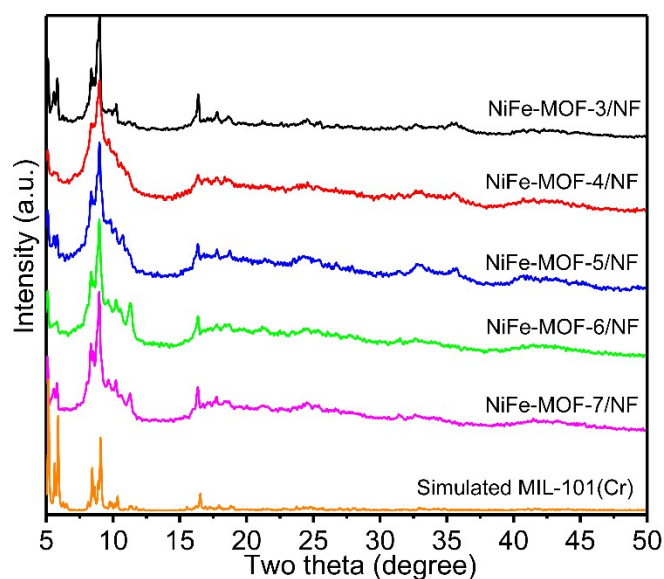

**Fig. S1** PXRD patterns of NiFe-MOF- $n$ /NF ( $x = 3, 4, 5, 6, 7$ ) and simulated MIL-101(Cr).

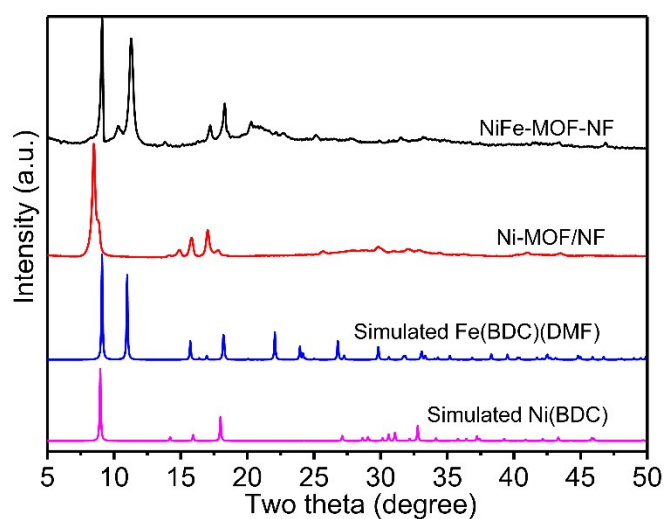

**Fig. S2** PXRD patterns of Ni-MOF/NF, NiFe-MOF/NF, simulated Ni(BDC) and simulated Fe(BDC)(DMF).

**Note:** The XRD pattern of Ni-MOF/NF should be assigned to Ni(BDC).<sup>1</sup> Notably, the diffraction peaks of Ni-MOF/NF were shifted to lower angles compared to the simulated pattern for Ni(BDC) possibly due to the influence of solvent.<sup>2</sup> As shown in **Fig. S2**, the diffraction peaks of obtained NiFe-MOF/NF matched well with Fe(BDC)(DMF) when iron and nickel salt were added during hydrothermal process.

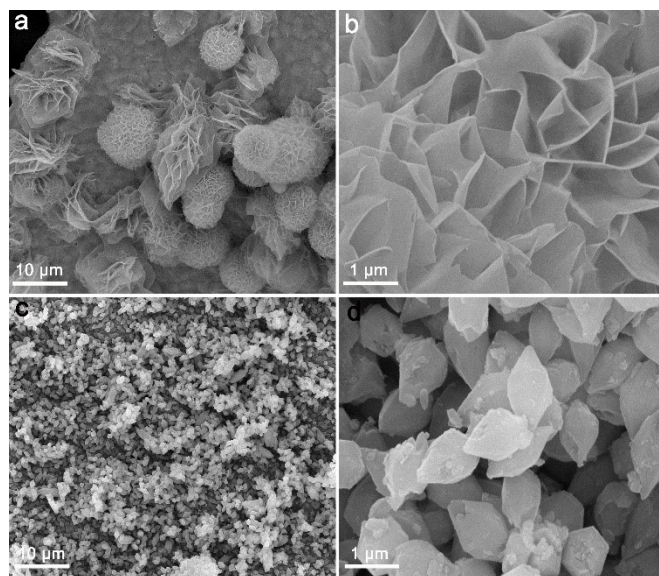

**Fig. S3** SEM images of (a, b) Ni-MOF/NF and (c, d) NiFe-MOF-NF.

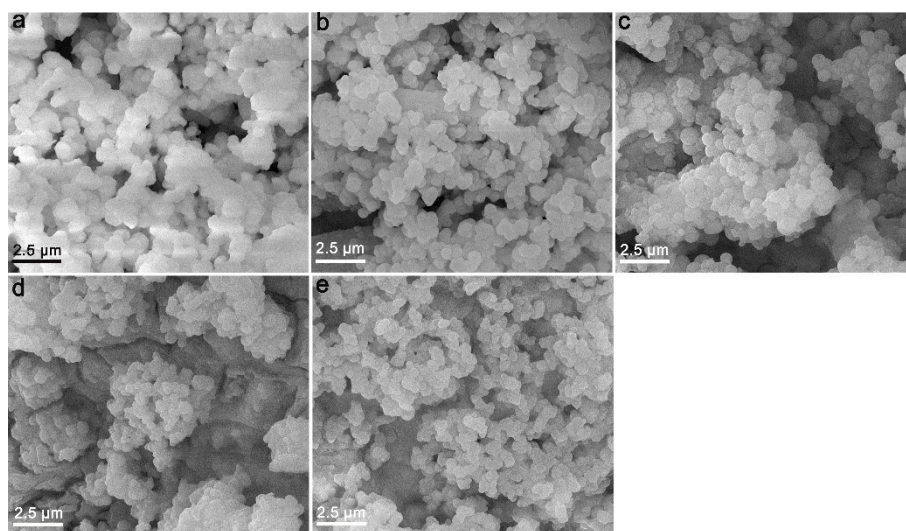

**Fig. S4** SEM images of (a) NiFe-MOF-3/NF, (b) NiFe-MOF-4/NF, (c) NiFe-MOF-5/NF, (d) NiFe-MOF-6/NF and (e) NiFe-MOF-7/NF.

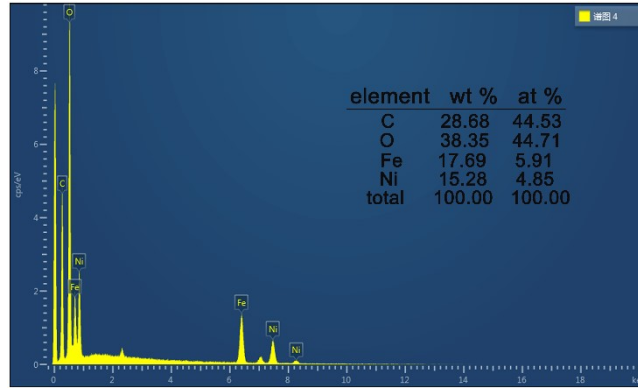

**Fig. S5** SEM-EDX spectra of NiFe-MOF-2/NF.

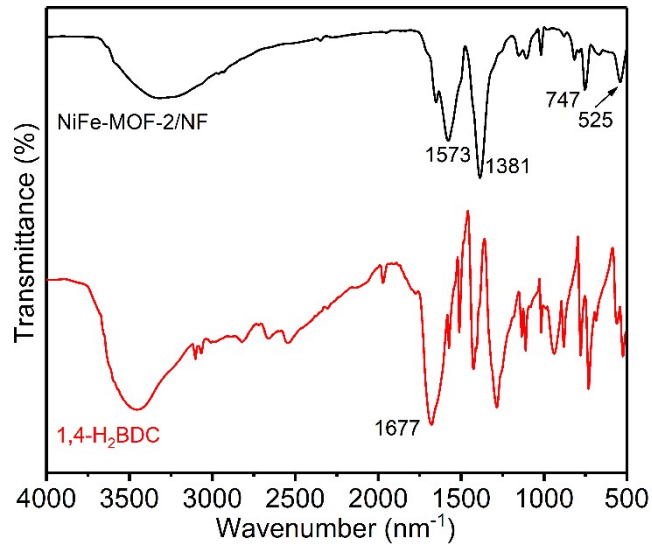

**Fig. S6** FT-IR spectrums of NiFe-MOF-2/NF and 1,4-H<sub>2</sub>BDC.

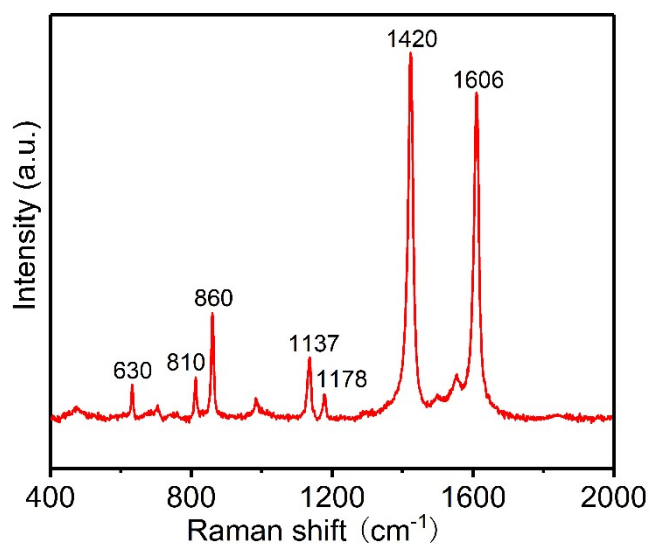

**Fig. S7** Raman spectra of NiFe-MOF-2/NF.

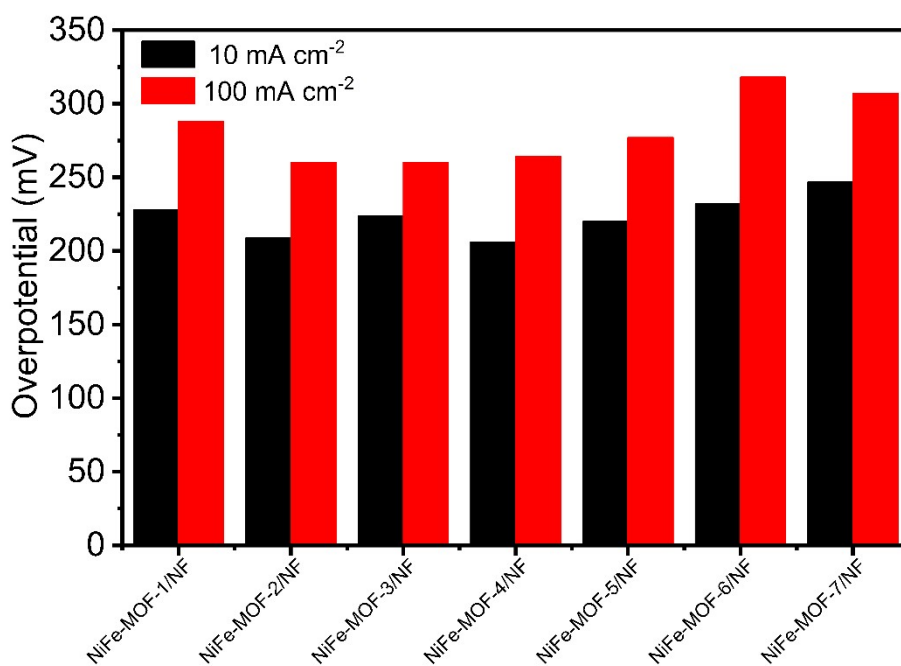

**Fig. S8** The comparison of the overpotentials to reach the current densities of 10 and 100 mA cm<sup>-2</sup>.

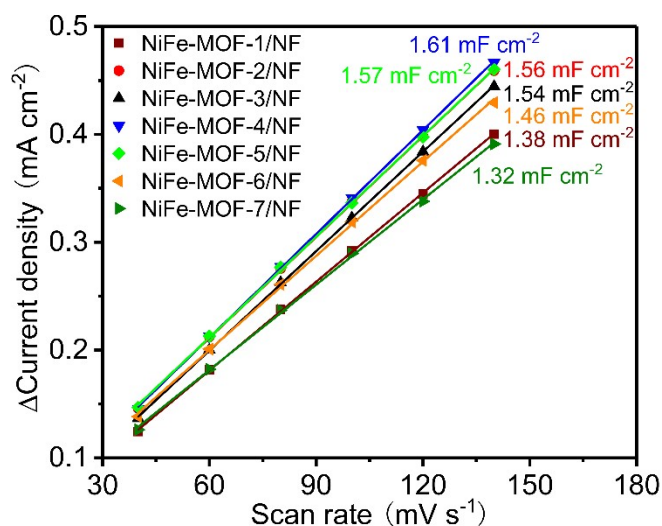

**Fig. S9** The plots of  $\Delta J$  versus scan rates for NiFe-MOF- $n$ /NF ( $n=1-7$ ).

**Note:** The ECSA of NiFe-MOF- $n$ /NF ( $n=1-7$ ) were determined by CV at varying rates from 40 to 140  $\text{mV s}^{-1}$ . The ECSA test of the NiFe-MOF- $n$ /NF ( $n=2, 3, 4, 5$ ) show similar values, as shown in **Fig. S9**, indicating that the accessible catalytically surface area, and thus active sites in the four samples are close to each other.

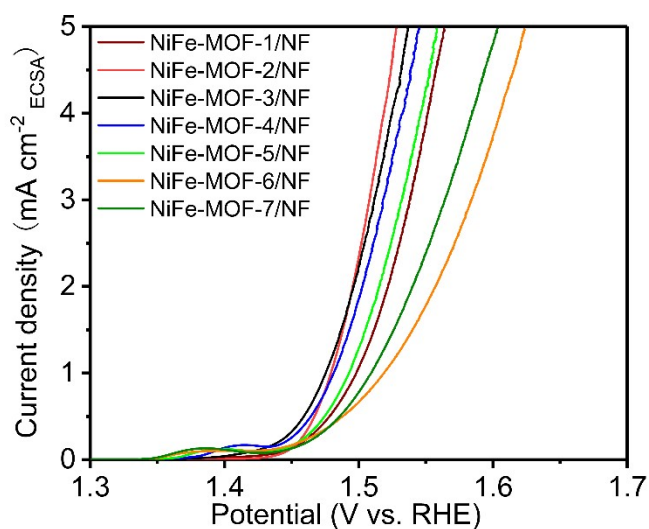

**Fig. S10** ECSA-normalized polarization curves for NiFe-MOF- $n$ /NF ( $n=1-7$ ).

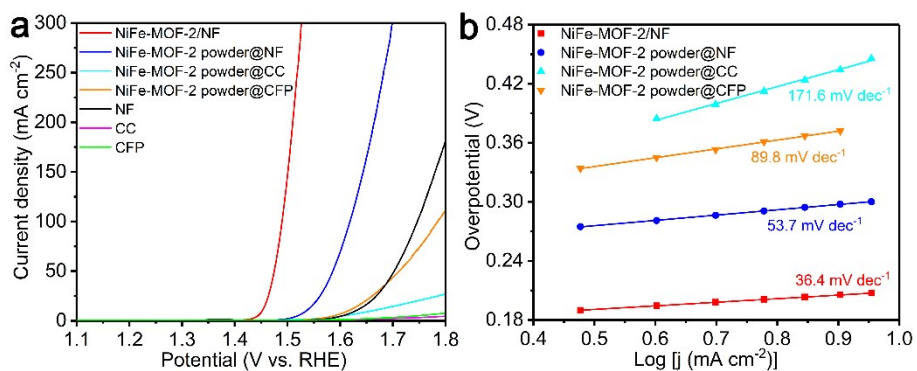

**Fig. S11** (a) The LSV curves of NiFe-MOF-2/NF, NiFe-MOF-2 powder@NF, NiFe-MOF-2 powder@CC, NiFe-MOF-2 powder@CFP, NF, CC and CFP, (b) the corresponding Tafel slopes.

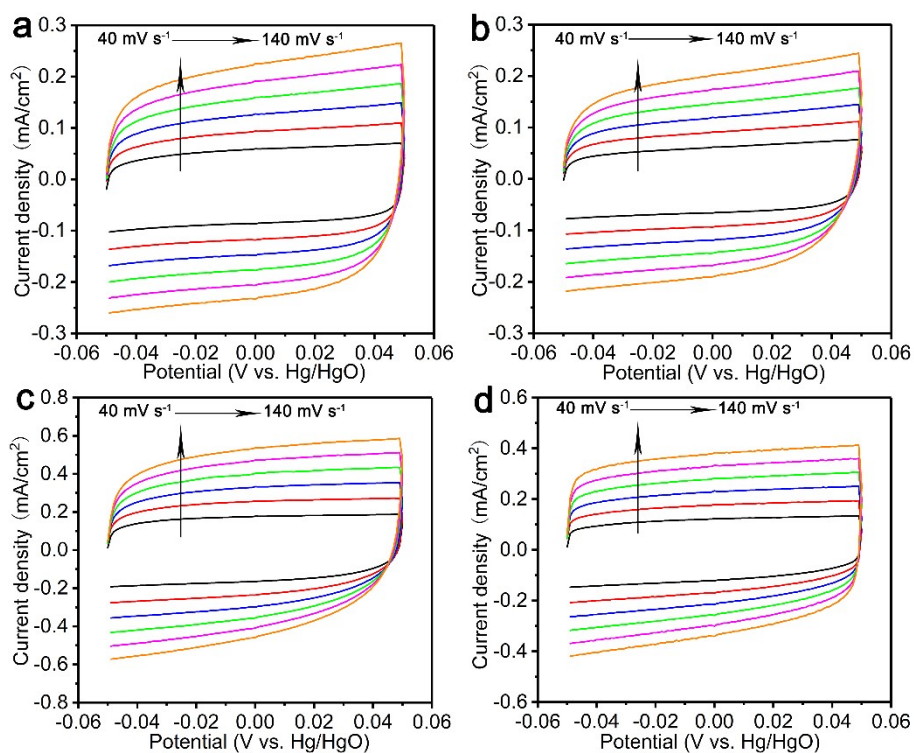

**Fig. S12** CV curves of (a) NiFe-MOF-2/NF, (b) NiFe-MOF-2 powder@NF, (c) NiFe-MOF-2 powder@CC and (d) NiFe-MOF-2 powder@CFP at different scan rates in the potential range of -0.05–0.05 V vs Hg/HgO.

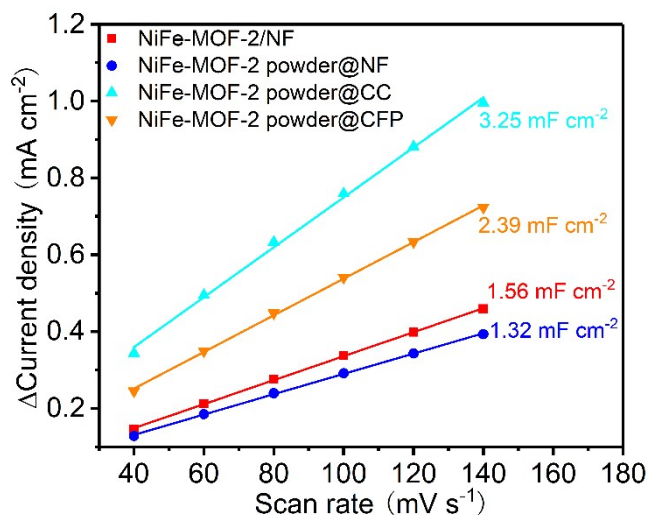

**Fig. S13** Charging current density differences plotted against scan rates of NiFe-MOF-2/NF, NiFe-MOF-2 powder@NF, NiFe-MOF-2 powder@CC and NiFe-MOF-2 powder@CFP at 0.92 V vs. RHE.

**Note:** To explore the significant OER activity difference between NiFe-MOF-2/NF, NiFe-MOF-2 powder@NF, NiFe-MOF-2 powder@CC and NiFe-MOF-2 powder@CFP, ECSA were evaluated by  $C_{dl}$  through CV measurement (**Fig. S12** and **S13**). Although both NiFe-MOF-2 powder@CC and NiFe-MOF-2 powder@CFP have larger  $C_{dl}$  value (3.25 mF cm<sup>-2</sup> and 2.39 mF cm<sup>-2</sup>) compared with NiFe-MOF-2 powder@NF and NiFe-MOF-2/NF, the  $C_{dl}$  of NiFe-MOF-2 powder@CC and NiFe-MOF-2 powder@CFP mostly derived from carbon supports.<sup>3</sup> NiFe-MOF-2/NF shows a higher  $C_{dl}$  (1.56 mF cm<sup>-2</sup>) than that of NiFe-MOF-2 powder@NF (1.32 mF cm<sup>-2</sup>), indicating more accessible active sites of NiFe-MOF-2/NF.



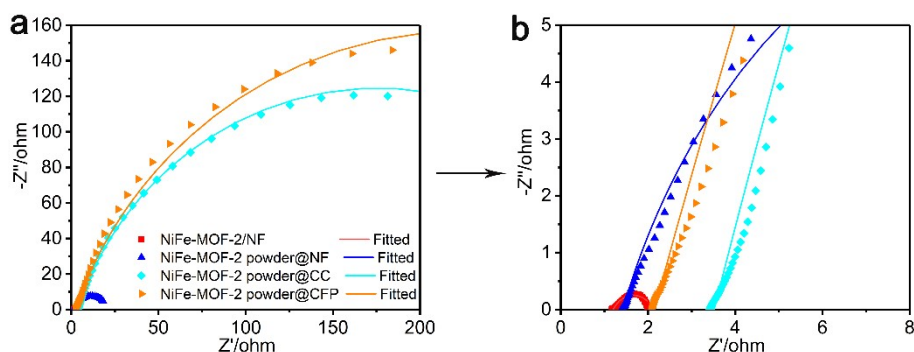

**Fig. S14** (a) Nyquist plots of electrodes at the overpotential of 250 mV, (b) enlarge Nyquist plots in the high frequency region.

**Note:** To further investigate the significant difference in OER performance among the four samples, EIS were carried out (**Fig. S14**). As expected, NiFe-MOF-2/NF exhibits the smallest semicircle radius in contrast to NiFe-MOF-2 powder@substrate samples, implying the lowest  $R_{ct}$  and fastest electron transfer kinetics. In addition, NiFe-MOF-2 powder@NF possesses much smaller  $R_{ct}$  than NiFe-MOF-2 powder@CC and NiFe-MOF-2 powder@CFP, which indicates that the improved OER performance of NiFe-MOF-2 powder@NF may result from enhanced conductivity of the NF substrate.

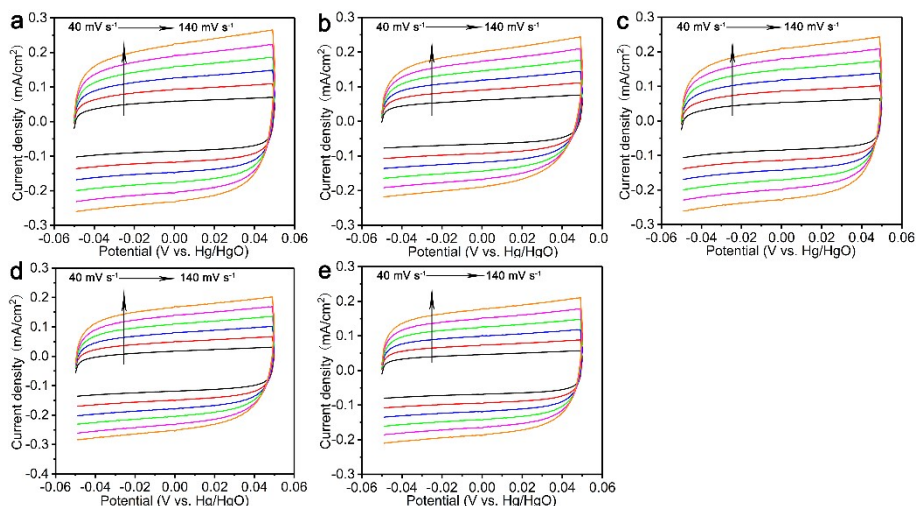

**Fig. S15** CV curves of (a) NiFe-MOF-2/NF, (b) NiFe-MOF-2 powder@NF, (c) Fe-MOF/NF, (d) Ni-MOF/NF and (e) NiFe-MOF-NF at different scan rates in the potential range of -0.05–0.05 V vs Hg/HgO.

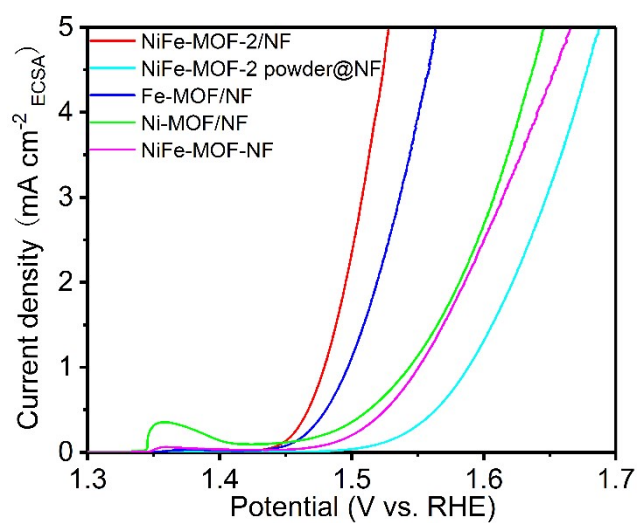

**Fig. S16** ECSA-normalized polarization curves for NiFe-MOF-2/NF, NiFe-MOF-2 powder@NF, Fe-MOF/NF, Ni-MOF/NF and NiFe-MOF-NF.

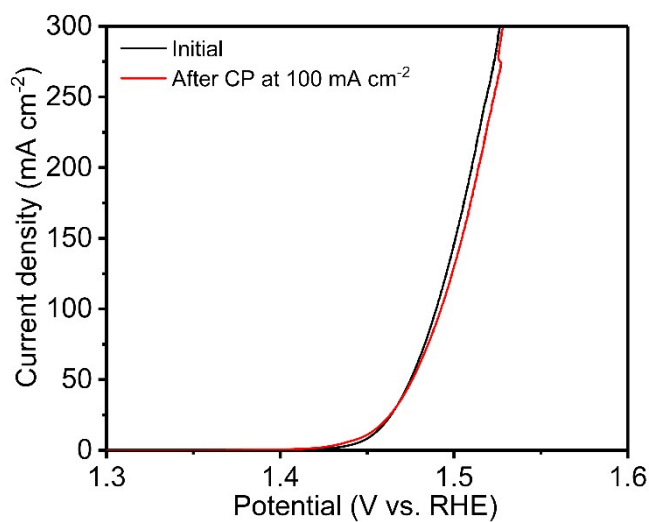

**Fig. S17** LSV curves of NiFe-MOF-2/NF before and after stability test.

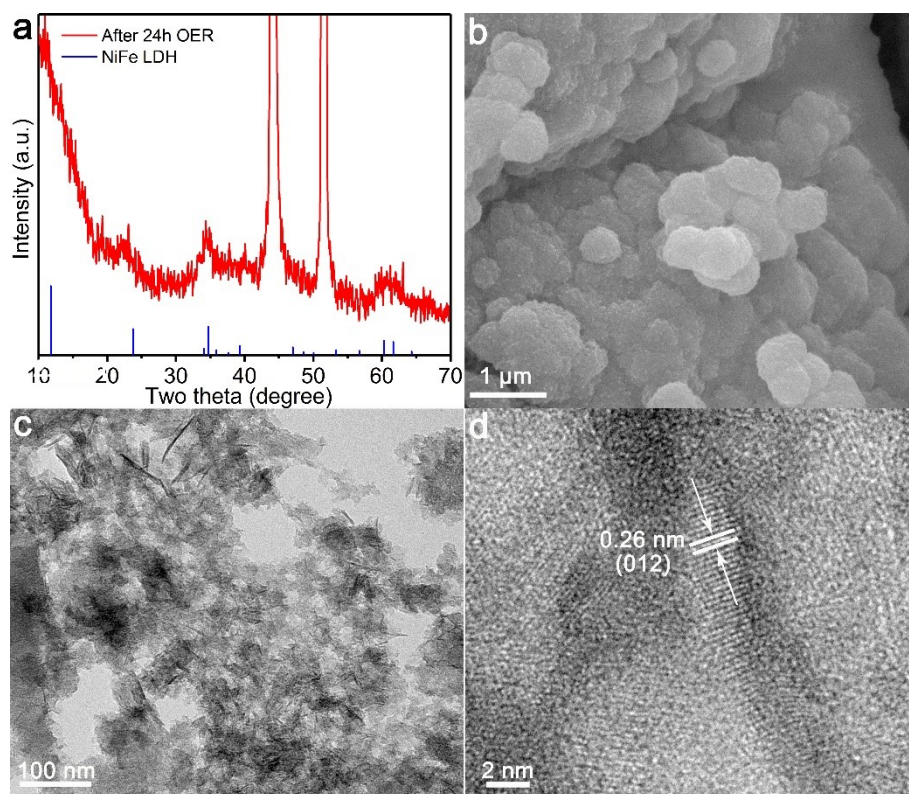

**Fig. S18** (a) XRD patterns of NiFe-MOF-2/NF after stability test; (b) SEM, (c) TEM and (d) HRTEM images of NiFe-MOF-2/NF after stability test.

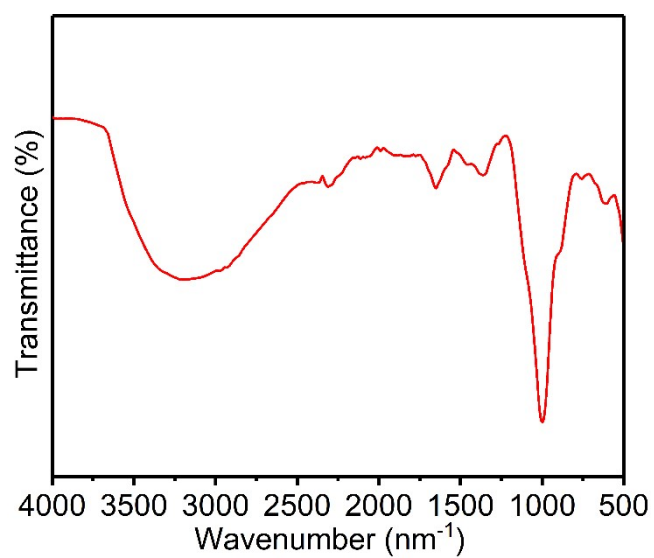

**Fig. S19** FT-IR spectra of NiFe-MOF-2/NF after stability test.

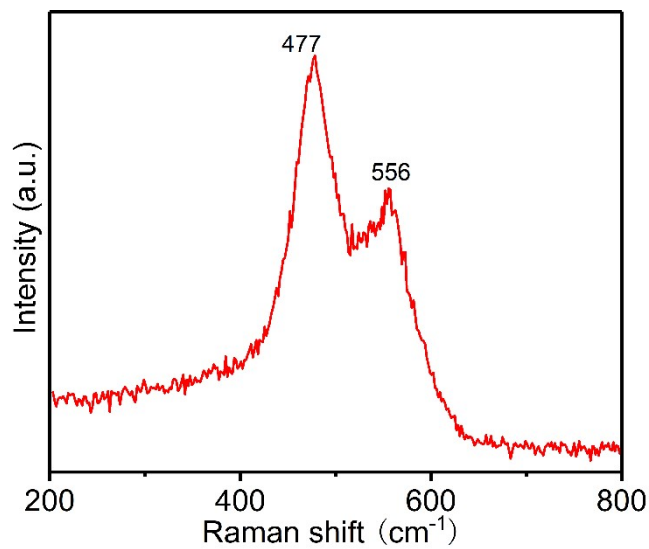

**Fig. S20** Raman spectra of NiFe-MOF-2/NF after stability test.

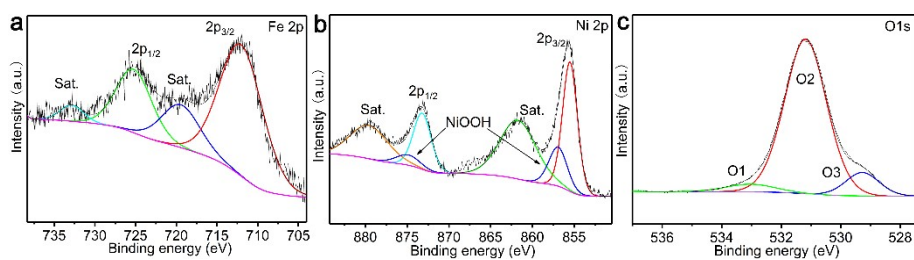

**Fig. S21** High-resolution XPS spectra of (a) Fe 2p, (b) Ni 2p and (c) O 1s for NiFe-MOF-2/NF after stability test.

**Table S1.** Comparison of OER performance of NiFe-MOF-2/NF with various NiFe-based OER electrocatalysts in 1 M KOH.

| Catalyst                                                  | Substrates | $\eta@10$<br>mA cm <sup>-2</sup><br>mV | $\eta@100$<br>mA cm <sup>-2</sup><br>mV | Tafel<br>Slope<br>mV dec <sup>-1</sup> | Stability<br>test | Referenc<br>e |
|-----------------------------------------------------------|------------|----------------------------------------|-----------------------------------------|----------------------------------------|-------------------|---------------|
| NiFe-MOF-2/NF                                             | NF         | 209                                    | 260                                     | 36.4                                   | 24 h              | This work     |
| MIL-88A/Ni(OH) <sub>2</sub>                               | CC         | 250                                    | -                                       | 36.4                                   | 40 h              | 4             |
| Ni <sub>3</sub> S <sub>2</sub> @Fe(OH) <sub>2</sub>       | GCE        | 230                                    | 288                                     | 33.1                                   | 300 h             | 5             |
| Ni-Fe-MOFs NSs                                            | GCE        | 221                                    | -                                       | 56                                     | 20 h              | 6             |
| Fe <sub>7.2%</sub> -Ni <sub>3</sub> S <sub>2</sub> NSs/NF | NF         | 295                                    | -                                       | 71                                     | 10 h              | 7             |
| FeCo-MOF-EH/NF                                            | NF         | 231                                    | -                                       | 42                                     | 30 h              | 8             |
| NiFe-NFF                                                  | NFF        | 227                                    | 253                                     | 38.9                                   | 15 h              | 9             |
| Fe <sub>1</sub> Ni <sub>2</sub> (BDC-NH <sub>2</sub> )/NF | NF         | 228                                    | -                                       | 30.3                                   | 12 h              | 10            |
| (Fe-Ni)Co <sub>x</sub> -OH/Ni <sub>3</sub> S <sub>2</sub> | NF         | -                                      | 280                                     | 57                                     | 100 h             | 11            |
| NiFeZr LDHs                                               | NF         | 198                                    | -                                       | 53.1                                   | 12 h              | 12            |
| FeNi-HDNAs                                                | NF         | 206                                    | 300                                     | 91.66                                  | 10 h              | 13            |
| Ni <sub>3</sub> Se <sub>4</sub> @NiFe LDH/CFC             | CFC        | 223                                    | 290                                     | 55.5                                   | 100 h             | 14            |
| NiV-LDH@FeOOH                                             | NF         | -                                      | 297                                     | 57.3                                   | 20 h              | 15            |
| Ni <sub>2</sub> P@FePOxHy                                 | NF         | 220                                    | 260                                     | 43                                     | 288 h             | 16            |
| CoNiFe-OH-1M                                              | NF         | 207                                    | 261                                     | 52.1                                   | 60 h              | 17            |
| HO <sub>oct</sub> -NFO NC/IF                              | IF         | 260                                    | 290                                     | 36.1                                   | 50 h              | 18            |

### Supplementary references

- 1 B. Wang, J. Shang, C. Guo, J. Zhang, F. Zhu, A. Han and J. Liu, A General Method to Ultrathin Bimetal-MOF Nanosheets Arrays via In Situ Transformation of Layered Double Hydroxides Arrays, *Small*, 2019, **15**, 1804761.
- 2 J. Wang, Q. Zhong, Y. Xiong, D. Cheng, Y. Zeng, Y. Bu, Fabrication of 3D Co-doped Ni-based MOF hierarchical micro-flowers as a high-performance electrode material for supercapacitors, *Appl. Surf. Sci.*, 2019, **483**, 1158–1165.
- 3 J. Wang, F. Xu, H. Jin, Y. Chen and Y. Wang, Non-Noble Metal-based Carbon Composites in Hydrogen Evolution Reaction: Fundamentals to Applications, *Adv. Mater.*, 2017, **29**, 1605838.
- 4 Z. Qian, K. Wang, K. Shi, Z. Fu, Z. Mai, X. Wang, Z. Tang and Y. Tian, Interfacial electron transfer of heterostructured MIL-88A/Ni(OH)<sub>2</sub> enhances the oxygen evolution reaction in alkaline solutions, *J. Mater. Chem. A*, 2020, **8**, 3311–3321.

- 5 J. Li, F. Liu, M. Yu, H. Hu, H. Liu and F. Cheng, Interfacial Engineering of Ni–Fe Based Electrocatalysts for Robust Oxygen Evolution, *J. Phys. Chem. C*, 2021, **125**, 25383–25391.
- 6 F.-L. Li, P. Wang, X. Huang, D. J. Young, H.-F. Wang, P. Braunstein and J.-P. Lang, Large-Scale, Bottom-Up Synthesis of Binary Metal–Organic Framework Nanosheets for Efficient Water Oxidation, *Angew. Chem. Int. Ed.*, 2019, **58**, 7051–7056.
- 7 Y. Zhu, H. Yang, K. Lan, K. Iqbal, Y. Liu, P. Ma, Z. Zhao, S. Luo, Y. Luo and J. Ma, Optimization of iron-doped Ni<sub>3</sub>S<sub>2</sub> nanosheets by disorder engineering for oxygen evolution reaction, *Nanoscale*, 2019, **11**, 2355–2365.
- 8 J. Tian, F. Jiang, D. Yuan, L. Zhang, Q. Chen and M. Hong, Electric-Field Assisted In Situ Hydrolysis of Bulk Metal–Organic Frameworks (MOFs) into Ultrathin Metal Oxyhydroxide Nanosheets for Efficient Oxygen Evolution, *Angew. Chem. Int. Ed.*, 2020, **59**, 13101–13108.
- 9 C. Cao, D.-D. Ma, Q. Xu, X.-T. Wu and Q.-L. Zhu, Semisacrificial Template Growth of Self-Supporting MOF Nanocomposite Electrode for Efficient Electrocatalytic Water Oxidation, *Adv. Funct. Mater.*, 2019, **29**, 1807418.
- 10 J. Ma, X. Bai, W. He, S. Wang, L. Li, H. Chen, T. Wang, X. Zhang, Y. Li, L. Zhang, J. Chen, F. Meng and Y. Fu, Amorphous FeNi-bimetallic infinite coordination polymers as advanced electrocatalysts for the oxygen evolution reaction, *Chem. Commun.*, 2019, **55**, 12567–12570.
- 11 Q. Che, Q. Li, X. Chen, Y. Tan, X. Xu, Assembling amorphous (Fe-Ni)Co<sub>x</sub>-OH/Ni<sub>3</sub>S<sub>2</sub> nanohybrids with S-vacancy and interfacial effects as an ultra-highly efficient electrocatalyst: Inner investigation of mechanism for alkaline water-to-hydrogen/oxygen conversion, *Appl. Catal. B- Environ.*, 2020, **263**, 118338.
- 12 R. Li, Y. Wang, W. Li, S. Zhou, P. Tian, H. Gao, X. Liu and J. Zang, Ternary NiFeZr layered double hydroxides: a highly efficient catalyst for the oxygen evolution reaction, *Chem. Commun.*, 2019, **55**, 13370–13373.
- 13 N. Yu, W. Cao, M. Huttula, Y. Kayser, P. Hoenicke, B. Beckhoff, F. Lai, R. Dong, H. Sun, B. Geng, Fabrication of FeNi hydroxides double-shell nanotube arrays with enhanced performance for oxygen evolution reaction, *Appl. Catal. B-Environ.*, 2020, **261**, 118193.
- 14 T. Zhang, L. Hang, Y. Sun, D. Men, X. Li, L. Wen, X. Lyu and Y. Li, Hierarchical hetero-Ni<sub>3</sub>Se<sub>4</sub>@NiFe LDH micro/nanosheets as efficient bifunctional electrocatalysts with superior stability for overall water splitting, *Nanoscale Horiz.*, 2019, **4**, 1132–1138.
- 15 W. Bao, L. Xiao, J. Zhang, Z. Deng, C. Yang, T. Ai and X. Wei, Interface engineering of NiV-LDH@FeOOH heterostructures as high-performance electrocatalysts for oxygen evolution reaction in alkaline conditions, *Chem. Commun.*, 2020, **56**, 9360–9363.
- 16 A. Meena, P. Thangavel, D. S. Jeong, A. N. Singh, A. Jana, H. Im, D. A. Nguyen, K. S. Kim, Crystalline-amorphous interface of mesoporous Ni<sub>2</sub>P @ FePO<sub>x</sub>H<sub>y</sub> for oxygen evolution at high current density in alkaline-anion-exchange-membrane water-electrolyzer, *Appl. Catal. B- Environ.*, 2022, **306**, 121127.

17 X. Li, M. Hou, X. Qu, Y. Zhang and M. Li, Electric-Field Assisted Hydrolysis-Oxidation of MOFs: Hierarchical Ternary (Oxy)hydroxide Micro-Flowers for Efficient Electrocatalytic Oxygen Evolution, *Small*, 2022, **18**, 2104863.

18 Y. Peng, C. Huang, J. Huang, M. Feng, X. Qiu, X. Yue and S. Huang, Filling Octahedral Interstices by Building Geometrical Defects to Construct Active Sites for Boosting the Oxygen Evolution Reaction on  $\text{NiFe}_2\text{O}_4$ , *Adv. Funct. Mater.*, 2022, **32**, 2201011.
